# Supplementary material
Source: PubMed Central journal article supplement (PMC2718310)
Supplement: mmc1.pdf [file mmc1.pdf]

Biophysical Journal, Volume 96

**Supporting Material**

**Prestin's anion transport and voltage sensing capabilities are independent.**

Jun-Ping Bai, Alexei Surguchev, Simone Montoya, Peter S. Aronson, Joseph Santos-Sacchi, and Dhasakumar Navaratnam

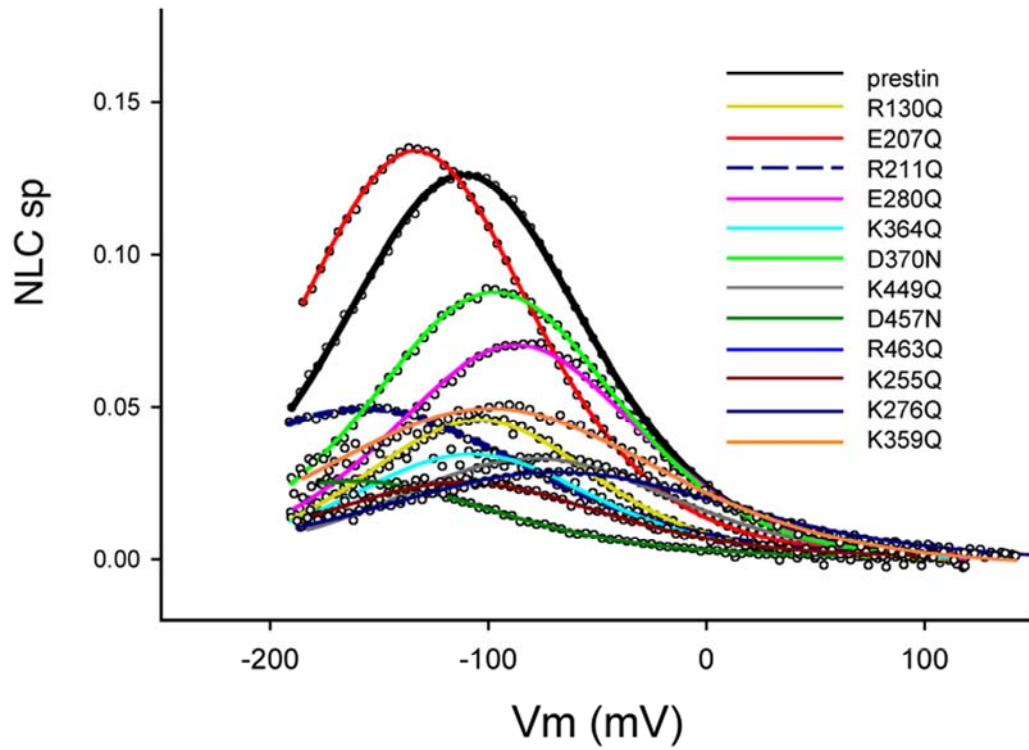

**Supplemental Figure 1** *NLC of charge mutants.* Shown are representative traces of NLCsp (NLC/ linear capacitance) of all 12 mutants that show a decrease in z.
